# Supplementary material for: MOF-derived (MoS2, γ-Fe2O3)/graphene Z-scheme photocatalysts with excellent activity for oxygen evolution under visible light irradiation
Source: Royal Society of Chemistry journal article supplement (doi:10.1039/d0ra02083d), 2020-01-01
Supplement: d0ra02083d1.pdf [file d0ra02083d1.pdf]

## Supplementary Information

# MOF-derived (MoS<sub>2</sub>, γ-Fe<sub>2</sub>O<sub>3</sub>)/graphene Z-scheme photocatalysts with excellent activity for oxygen evolution under visible light irradiation

Ang Li<sup>1</sup>, Yuxiang Liu<sup>1</sup>, Xuejun Xu<sup>2</sup>, Yuanyuan Zhang<sup>1</sup>, Zhichun Si<sup>\*1</sup>, Xiaodong Wu<sup>3</sup>,  
Rui Ran<sup>3</sup>, Duan Weng<sup>1,3</sup>

<sup>1</sup> *Tsinghua Shenzhen International Graduate School, Tsinghua University, Shenzhen City, 518055, China*

<sup>2</sup> *College of Materials Science and Energy Engineering, Foshan University, Foshan City, 528000, China*

<sup>3</sup> *The Key Laboratory of Advanced Materials of Ministry of Education, School of Materials Science and Engineering, Tsinghua University, Beijing City, 10084, China*

*\*Corresponding author: si.zhichun@sz.tsinghua.edu.cn*

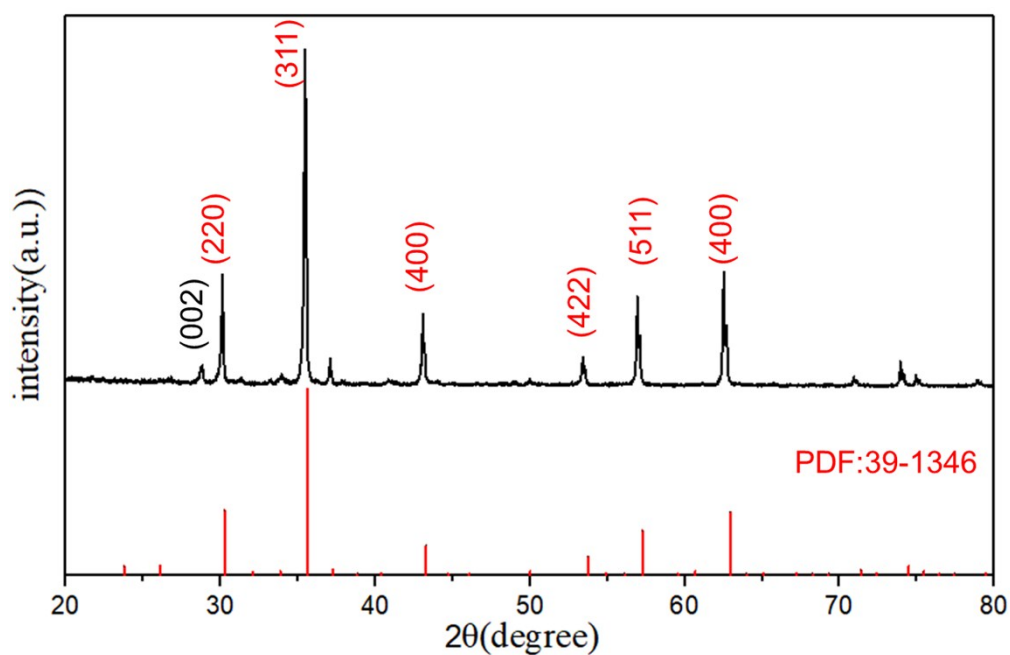

Fig.S1 XRD pattern of FG.

Table S1 Element content of the MFG purified with aqua regia.

| sample | elemental concentration (mg/L) |       |       | elemental actual loading $\omega$ (wt%) |     |      |
|--------|--------------------------------|-------|-------|-----------------------------------------|-----|------|
|        | Mo                             | S     | Fe    | Mo                                      | S   | Fe   |
| MFC    | 0.313                          | 1.354 | 8.898 | 1.4                                     | 5.9 | 40.4 |

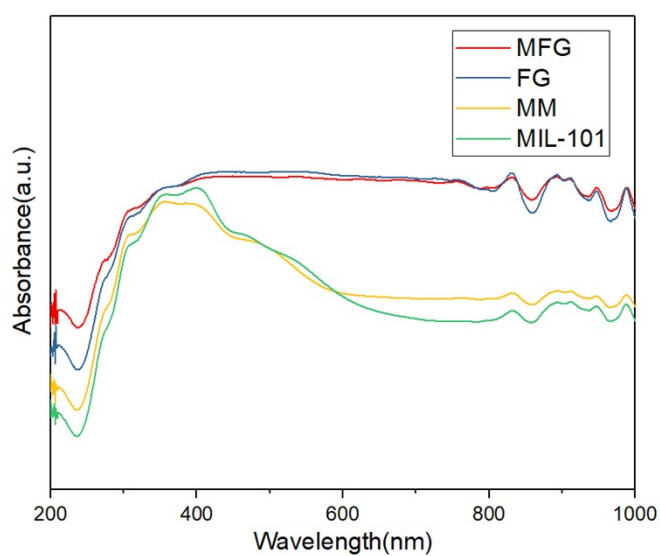

Fig.S2 UV-visible diffuse reflectance spectroscopy of MIL-101, MM, FG and MFG
